# Supplementary material
Source: publisher site journal article supplement (https://static.cambridge.org/content/id/urn:cambridge.org:id:article:S1049023X19004333/resource/name/S1049023X19004333supp001.docx)

**eTable 1.** Means of attack in security incidents involving aid workers in healthcare settings by country, worldwide, 1997-2016.

| **Means of attack** | **N** | **%** | **N** | **%** |
| --- | --- | --- | --- | --- |
| **Gun attack** |  |  | **23** | **31.1%** |
| Afghanistan | 5 | 20.0% |  |  |
| Pakistan | 5 | 20.0% |  |  |
| Somalia | 4 | 16.0% |  |  |
| Syrian Arab Republic | 2 | 8.0% |  |  |
| Kenya | 2 | 8.0% |  |  |
| Honduras | 1 | 4.0% |  |  |
| Sudan | 1 | 4.0% |  |  |
| Yemen | 1 | 4.0% |  |  |
| Nigeria | 1 | 4.0% |  |  |
| South Sudan | 1 | 4.0% |  |  |
| **Kidnapping** |  |  | **23** | **31.1%** |
| Afghanistan | 16 | 72.7% |  |  |
| Pakistan | 2 | 9.1% |  |  |
| Syrian Arab Republic | 1 | 4.5% |  |  |
| Sudan | 1 | 4.5% |  |  |
| Yemen | 1 | 4.5% |  |  |
| Burundi | 1 | 4.5% |  |  |
| Somalia | 1 | 4.5% |  |  |
| **Bombing** |  |  | **16** | **21.6%** |
| Syrian Arab Republic | 3 | 16.7% |  |  |
| Sudan | 3 | 16.7% |  |  |
| Yemen | 3 | 16.7% |  |  |
| Afghanistan | 3 | 16.7% |  |  |
| Sri Lanka | 1 | 5.6% |  |  |
| Occupied Palestinian Territories | 1 | 5.6% |  |  |
| Pakistan | 1 | 5.6% |  |  |
| Somalia | 1 | 5.6% |  |  |
| **Physical assault** |  |  | **6** | **8.1%** |
| Afghanistan | 4 | 57.1% |  |  |
| Sudan | 1 | 14.3% |  |  |
| Central African Republic | 1 | 14.3% |  |  |
| **Unknown forms of attack** |  |  | **6** | **8.1%** |
| Afghanistan | 4 | 60.0% |  |  |
| Somalia | 1 | 20.0% |  |  |
| Angola | 1 | 20.0% |  |  |
| **Total** | **74** |  | **74** | **100.0%** |

**eFigure 1.** Aid workers kidnapped, injured, and killed during security incidents in healthcare settings by country, 1997-2016.


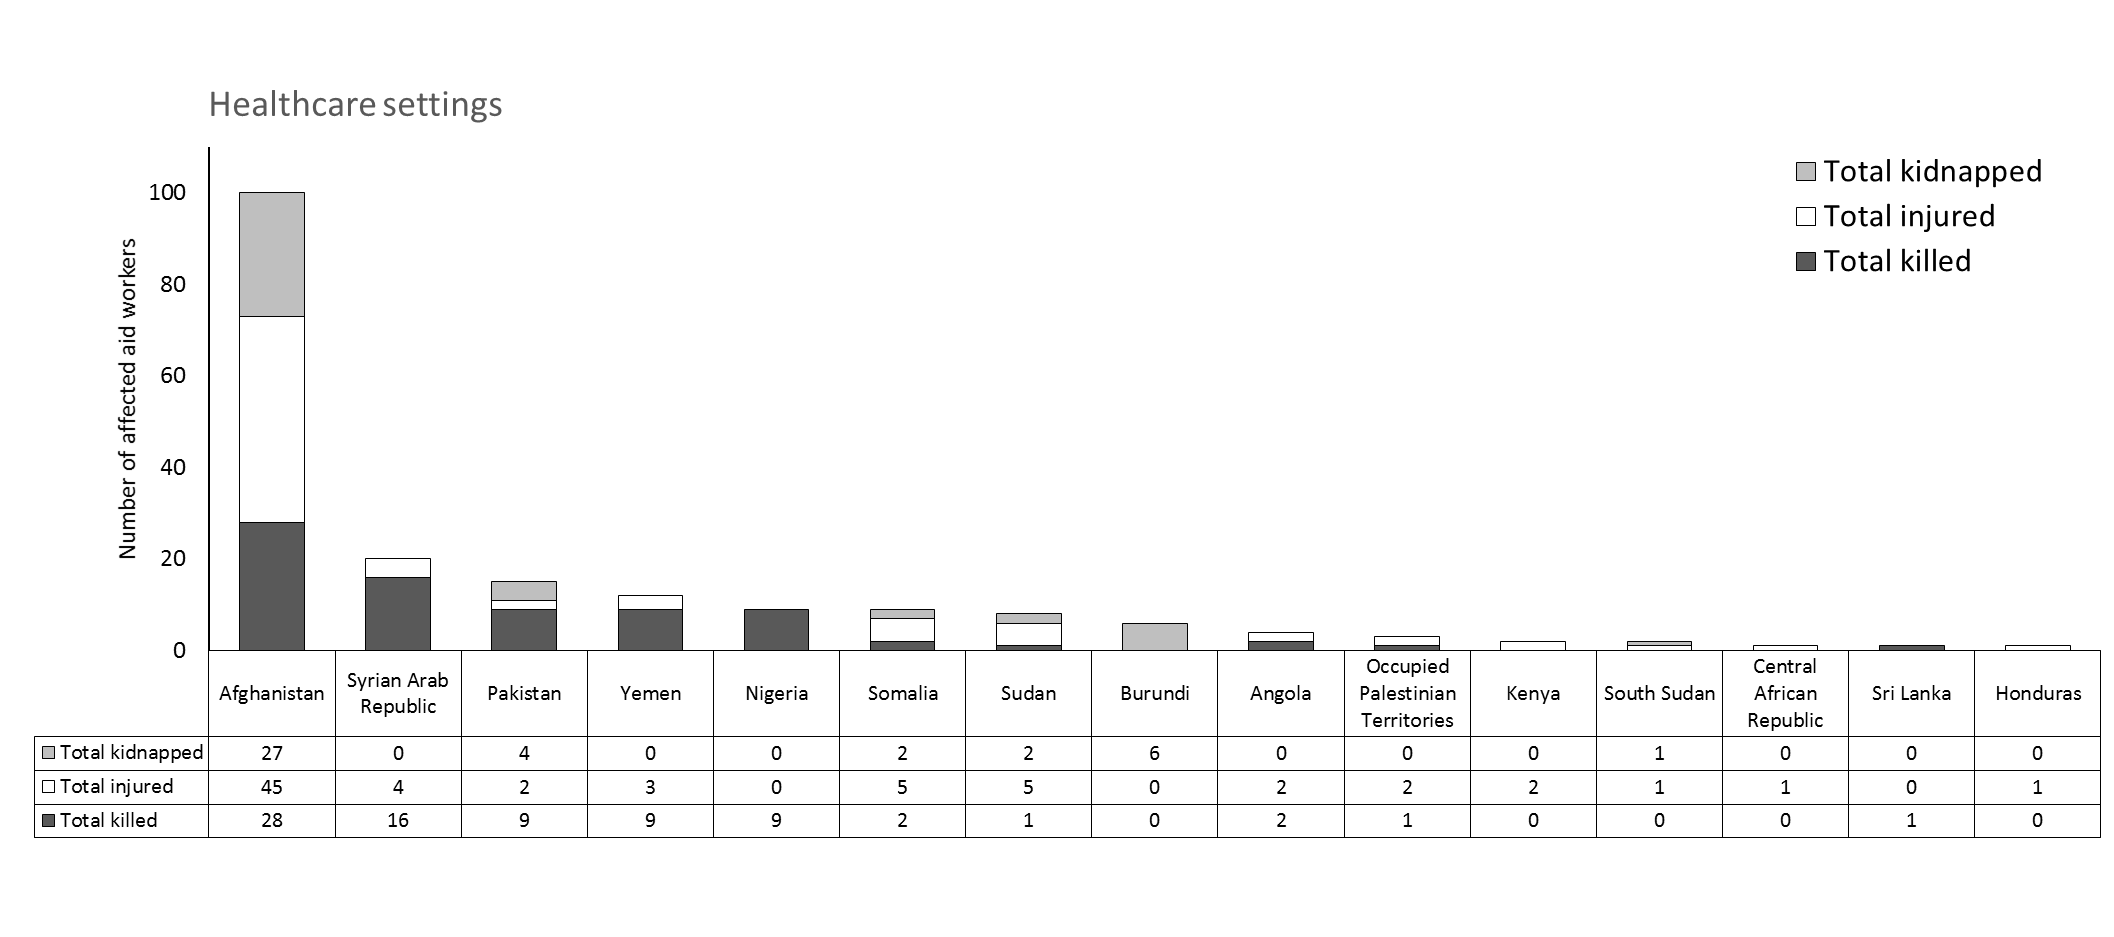


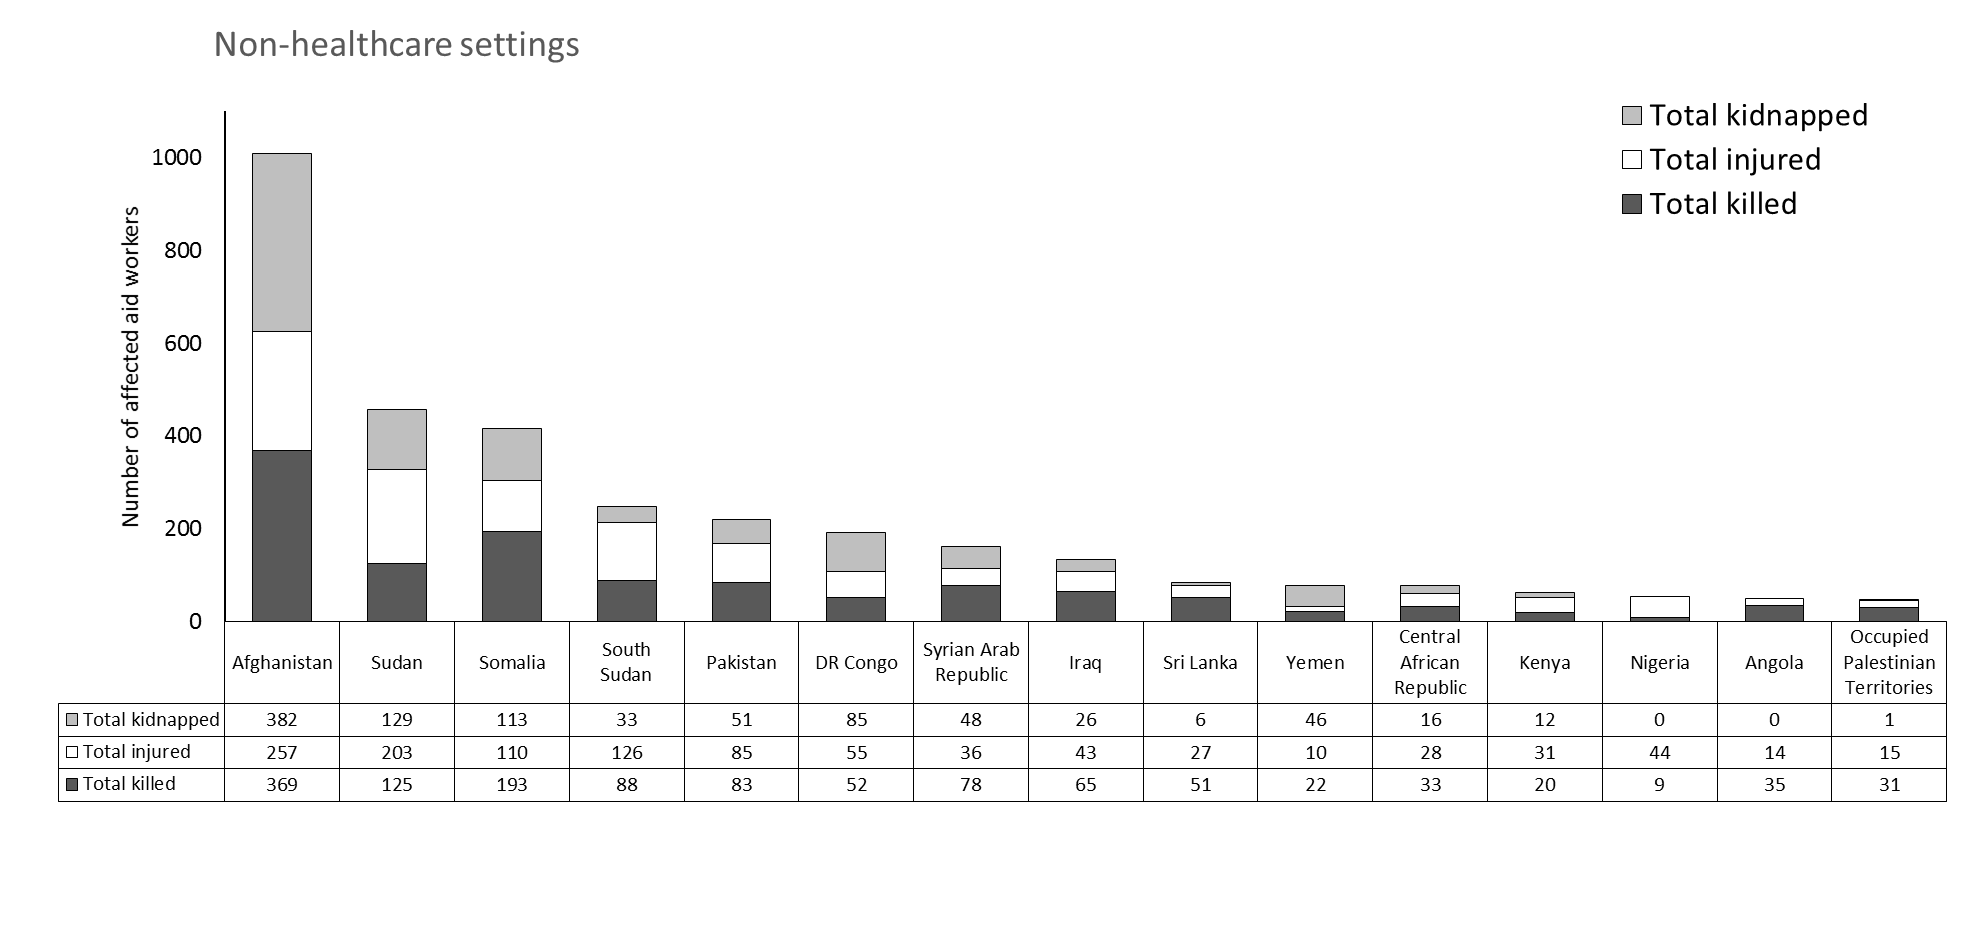

Supplement: Supplementary file 1 [file S1049023X19004333supp001.docx]
